# Supplementary material for: Screening and identification of angiogenesis-related genes as potential novel prognostic biomarkers of hepatocellular carcinoma through bioinformatics analysis
Source: Aging (Albany NY). 2021 Jul 12;13(13):17707–33. doi: 10.18632/aging.203260 (PMC8312452; doi:10.18632/aging.203260)
Supplement: Supplementary Table 3 [file aging-13-203260-s003.xlsx]

## Sheet: Table S3
Supplementary Table 3. The annotated gene set file used in ssGSEA.
aDCs	na	CD83	LAMP3	CCL1
APC_co_inhibition	na	C10orf54	CD274	LGALS9	PDCD1LG2	PVRL3
APC_co_stimulation	na	CD40	CD58	CD70	ICOSLG	SLAMF1	TNFSF14	TNFSF15	TNFSF18	TNFSF4	TNFSF8	TNFSF9
B_cells	na	BACH2	BANK1	BLK	BTLA	CD79A	CD79B	FCRL1	FCRL3	HVCN1	RALGPS2
CCR	na	CCL16	TPO	TGFBR2	CXCL2	CCL14	TGFBR3	IL11RA	CCL11	IL4I1	IL33	CXCL12	CXCL10	BMPER	BMP8A	CXCL11	IL21R	IL17B	TNFRSF9	ILF2	CX3CR1	CCR8	TNFSF12	CSF3	TNFSF4	BMP3	CX3CL1	BMP5	CXCR2	TNFRSF10D	BMP2	CXCL14	CCL28	CXCL3	BMP6	CCL21	CXCL9	CCL23	IL6	TNFRSF18	IL17RD	IL17D	IL27	CCL7	IL1R1	CXCR4	CXCR2P1	TGFB1I1	IFNGR1
CD8+_T_cells	na	CD8A
Check-point	na	IDO1	LAG3	CTLA4	TNFRSF9	ICOS	CD80	PDCD1LG2	TIGIT	CD70	TNFSF9	ICOSLG	KIR3DL1	CD86	PDCD1	LAIR1	TNFRSF8	TNFSF15	TNFRSF14	IDO2	CD276	CD40	TNFRSF4	TNFSF14	HHLA2	CD244	CD274	HAVCR2	CD27	BTLA	LGALS9	TMIGD2	CD28	CD48	TNFRSF25	CD40LG	ADORA2A	VTCN1	CD160	CD44	TNFSF18	TNFRSF18	BTNL2	C10orf54	CD200R1	TNFSF4	CD200	NRP1
Cytolytic_activity	na	PRF1	GZMA
DCs	na	CCL17	CCL22	CD209	CCL13
HLA	na	HLA-E	HLA-DPB2	HLA-C	HLA-J	HLA-DQB1	HLA-DQB2	HLA-DQA2	HLA-DQA1	HLA-A	HLA-DMA	HLA-DOB	HLA-DRB1	HLA-H	HLA-B	HLA-DRB5	HLA-DOA	HLA-DPB1	HLA-DRA	HLA-DRB6	HLA-L	HLA-F	HLA-G	HLA-DMB	HLA-DPA1
iDCs	na	CD1A	CD1E
Inflammation-promoting	na	CCL5	CD19	CD8B	CXCL10	CXCL13	CXCL9	GNLY	GZMB	IFNG	IL12A	IL12B	IRF1	PRF1	STAT1	TBX21
Macrophages	na	C11orf45	CD68	CLEC5A	CYBB	FUCA1	GPNMB	HS3ST2	LGMN	MMP9	TM4SF19
Mast_cells	na	CMA1	MS4A2	TPSAB1
MHC_class_I	na	B2M	HLA-A	TAP1
Neutrophils	na	EVI2B	HSD17B11	KDM6B	MEGF9	MNDA	NLRP12	PADI4	SELL	TRANK1	VNN3
NK_cells	na	KLRC1	KLRF1
Parainflammation	na	CXCL10	PLAT	CCND1	LGMN	PLAUR	AIM2	MMP7	ICAM1	MX2	CXCL9	ANXA1	TLR2	PLA2G2D	ITGA2	MX1	HMOX1	CD276	TIRAP	IL33	PTGES	TNFRSF12A	SCARB1	CD14	BLNK	IFIT3	RETNLB	IFIT2	ISG15	OAS2	REL	OAS3	CD44	PPARG	BST2	OAS1	NOX1	PLA2G2A	IFIT1	IFITM3	IL1RN
pDCs	na	CLEC4C	CXCR3	GZMB	IL3RA	IRF7	IRF8	LILRA4	PHEX	PLD4	PTCRA
T_cell_co-inhibition	na	BTLA	C10orf54	CD160	CD244	CD274	CTLA4	HAVCR2	LAG3	LAIR1	TIGIT
T_cell_co-stimulation	na	CD2	CD226	CD27	CD28	CD40LG	ICOS	SLAMF1	TNFRSF18	TNFRSF25	TNFRSF4	TNFRSF8	TNFRSF9	TNFSF14
T_helper_cells	na	CD4
Tfh	na	PDCD1	CXCL13	CXCR5
Th1_cells	na	IFNG	TBX21	CTLA4	STAT4	CD38	IL12RB2	LTA	CSF2
Th2_cells	na	PMCH	LAIR2	SMAD2	CXCR6	GATA3	IL26
TIL	na	ITM2C	CD38	THEMIS2	GLYR1	ICOS	F5	TIGIT	KLRD1	IRF4	PRKCQ	FCRL5	SIRPG	LPXN	IL2RG	CCL5	LCK	TRAF3IP3	CD86	MAL	LILRB1	DOK2	CD6	PAG1	LAX1	PLEK	PIK3CD	SLAMF1	XCL1	GPR171	XCL2	TBX21	CD2	CD53	KLHL6	SLAMF6	CD40	SIT1	TNFRSF4	CD79A	CD247	LCP2	CD3D	CD27	SH2D1A	FYB	ARHGAP30	ACAP1	CST7
Treg	na	IL12RB2	TMPRSS6	CTSC	LAPTM4B	TFRC	RNF145	NETO2	ADAT2	CHST2	CTLA4	NFE2L3	LIMA1	IL1R2	ICOS	HSDL2	HTATIP2	FKBP1A	TIGIT	CCR8	LTA	SLC35F2	IL21R	AHCYL1	SOCS2	ETV7	BCL2L1	RRAGB	ACSL4	CHRNA6	BATF	LAX1	ADPRH	TNFRSF4	ANKRD10	CD274	CASP1	LY75	NPTN	SSTR3	GRSF1	CSF2RB	TMEM184C	NDFIP2	ZBTB38	ERI1	TRAF3	NAB1	HS3ST3B1
Type_I_IFN_Reponse	na	DDX4	IFIT1	IFIT2	IFIT3	IRF7	ISG20	MX1	MX2	RSAD2	TNFSF10
Type_II_IFN_Reponse	na	GPR146	SELP	AHR
[truncated: 206 more columns]
